contrast clonidine, a relatively specific alpha-2 agonist that acts indirectly by reducing central nervous system sympathetic outflow, would not be blocked by the actions of ethacrynic acid.<sup>4</sup> The mechanism for poor absorption in critically ill patients proposed by the authors may account for the ability of rectally administered clonidine to control hypertension in their patient when oral clonidine failed.

MICHAEL P. HOSKING, M.D.  
*Resident in Anesthesiology  
Mayo Graduate School of Medicine  
Mayo Clinic  
Rochester, Minnesota 55905*

Anesthesiology  
65:129, 1986

*In reply:* We thank Dr. Hosking for his comments and concern that the use of ethacrynic acid may have interfered with the vasodilator actions of both nitroglycerin and nitropruside.

We reexamined our cases and noted that the first patient received ethacrynic acid, but as a secondary measure late in the course of managing her hypertension. None of the other five cases received ethacrynic acid. Therefore, we do not feel that ethacrynic acid interfered with the vasodilators in the first case. We will certainly keep this drug interaction in mind for future reference.

ROBERT V. JOHNSTON, JR., M.D.  
*Assistant Professor*

Anesthesiology  
65:129-130, 1986

## REFERENCES

1. Johnston RV, Nicholas DA, Lawson NW, Wallfisch HK, Arens JF: The use of rectal clonidine in the perioperative period. *ANESTHESIOLOGY* 64:288-290, 1986
2. Needleman P: Organic Nitrates. New York, Springer-Verlag, 1985
3. Kaplan JA: Nitrates, Cardiac Anesthesia, vol. 2. Cardiovascular Pharmacology. Edited by Kaplan JA. Orlando, Grune & Stratton, 1983, pp 151-180
4. Kaplan NM: Systemic hypertension: therapy, Heart Disease: A Textbook of Cardiovascular Medicine. Edited by Braunwald E. Philadelphia, WB Saunders, 1984, pp 902-927

(Accepted for publication March 17, 1986.)

DEBORAH A. NICHOLAS, M.D.  
*Assistant Professor*

NOEL W. LAWSON, M.D.  
*Professor*

HARRY K. WALLFISCH, M.D.  
*Associate Professor*

JAMES F. ARENS, M.D.  
*Professor and Chairman*

*Department of Anesthesiology  
The University of Texas Medical Branch  
Galveston, Texas 77550*

(Accepted for publication March 17, 1986.)

## Fail-safe Oxygen Analyzers

*To the Editor:*—Whenever nitrous oxide is supplied to an anesthesia circuit, there is a real possibility that a hypoxic mixture will be delivered secondary to human error in setting the flow controls. Less commonly, inaccurate or leaky flowmeters in conjunction with N<sub>2</sub>O can lead to hypoxia. Use of an oxygen analyzer allows early detection of these errors but is often vitiated by another human error, failure to turn the analyzer on. A modification of

the anesthesia machine could guarantee that nitrous oxide will only be used when the oxygen analyzer is on.

An electromechanical fail-safe valve should be placed in the nitrous oxide intermediate pressure line. This valve would only be opened by a solenoid that is activated when the oxygen analyzer is turned on. Nitrous oxide could not be delivered unless the O<sub>2</sub> analyzer is turned on! If the machine is equipped with air or N<sub>2</sub>, these lines should also have electromechanical fail-safes. Of course the low O<sub>2</sub> alarm must have a default preventing settings below 20%.<sup>1</sup> Perhaps the fail-safe analyzer should be further refined to shut the valves automatically whenever reading below 20%, thus allowing only oxygen to be delivered to

---

The opinions and assertions contained herein are the private views of the author and are not to be construed as reflecting the views of the Department of the Army or the Department of Defense.
